# Supplementary material
Source: publisher site journal article supplement (https://www.spandidos-publications.com/6153/downloadSupplementary)
Supplement: Supplementary file 1 [file downloadSupplementary]

## Sheet: 2023-03-21 Pubmed
Table SII. List of 50 references: 8q24 AND gastric cancer (PubMed)
PMID	Title	Authors	Citation	Publication Year	Population	Sample Numbers	Methods	Genes	SNPs
37029242	LncRNA CASC19: a novel oncogene involved in human cancer	Wang S, Qiao C, Fang R, Yang S, Zhao G, Liu S, Li P.	Clin Transl Oncol. 2023 Apr 7. doi: 10.1007/s12094-023-03165-x. Epub ahead of print. PMID: 37029242.	2023	USA	407 patients and 211 controls	GEPIA2 data base	CASC19	lncRNA CASC19
36995485	Cross-phenotype association analysis of gastric cancer: in-silico functional annotation based on the disease-gene network.	Lee S, Yang HK, Lee HJ, Park DJ, Kong SH, Park SK.	Gastric Cancer. 2023 Mar 30. doi: 10.1007/s10120-023-01380-7. Epub ahead of print. PMID: 36995485.	2023	Korean	8299 cases and 231121 controls	GBA, SNP, GWAS,eQTL,GTEx	MTX1, GBAP1, MUC1, TRIM46, THBS3, PSCA, ABO	rs2294008
36039443	Genetic and Transcriptional Analysis of 8q24.21 Cluster in Gastric Cancer	Pereira BS, Wisnieski F, Calcagno DQ, Santos LC, Gigek CO, Chen ES, Rasmussen LT, Payão SLM, Almeida RS, Pinto CA, Karia BTR, Artigiani R, Demachki S, Assumpção PP, Lourenço LG, Arasaki CH, Burbano RR, Leal MF, Smith MAC	Anticancer Res. 2022 Sep;42(9):4381-4394. doi: 10.21873/anticanres.15938.	2022	NA	Fifty-one to 85 matched pairs of tumoral and adjacent non-tumoral gastric tissues, from patients with primary GC, were used to analyze gene expression and CNV of the selected genes. We also included 29 H. pylori negative and gastritis negative gastric mucosa tissues from individuals without cancer obtained by endoscopy, as wthtrol samples.	NA	FAM49B, GSDMC and miR-5194, FAM84B	NA
34472665	LncPSCA in the 8q24.3 risk locus drives gastric cancer through destabilizing DDX5	Zheng Y, Lei T, Jin G, Guo H, Zhang N, Chai J, Xie M, Xu Y, Wang T, Liu J, Shen Y, Song Y, Wang B, Yu J, Yang M.	EMBO Rep. 2021 Nov 4;22(11):e52707. doi: 10.15252/embr.202152707. Epub 2021 Sep 2.	2021	China	3771 GC and 5426 controls	GWAS	lncPSCA, DDX5, p53	rs2978980- lncPSCA
33713253	Investigating the association between rs6983267 polymorphism and susceptibility to gastrointestinal cancers in Iranian population	Karimi F, Amiri-Moghaddam SM, Bagheri Z, Bahrami AR, Goshayeshi L, Allahyari A, Mirsadraee M, Fanipakdel A, Bari A, Emadi-Torghabeh A, Kerachian MA, Rahimi H, Matin MM.	Mol Biol Rep. 2021 Mar;48(3):2273-2284. doi: 10.1007/s11033-021-06249-5. Epub 2021 Mar 13.	2021	Iran	135 esophageal, 170 gastric and 173 cases of colorrectal cancer	TaqMan real-time PCR	MYC, CCAT2	Rs6983267-CCAT2
32590746	Cumulative evidence of relationships between multiple variants in 8q24 region and cancer incidence	Tong Y, Tang Y, Li S, Zhao F, Ying J, Qu Y, Niu X, Mu D.	Medicine (Baltimore). 2020 Jun 26;99(26):e20716. doi: 10.1097/MD.0000000000020716.	2020	African, Asian, Caucasian, Hawaians and latino patients	103 articles	Systematic review	MYC, TCF7L2, FAM84B	rs1447295
32150871	The Complex Network between MYC Oncogene and microRNAs in Gastric Cancer: An Overview	Anauate AC, Leal MF, Calcagno DQ, Gigek CO, Karia BTR, Wisnieski F, Dos Santos LC, Chen ES, Burbano RR, Smith MAC.	Int J Mol Sci. 2020 Mar 5;21(5):1782. doi: 10.3390/ijms21051782.	2020	NA	NA	NA	MYC, PVT1	NA
32117633	Long non-coding RNA polymorphisms on 8q24 are associated with the prognosis of gastric cancer in a Chinese population	Zhang Y, Wu Y, Jia Z, Cao D, Yang N, Wang Y, Cao X, Jiang J.	PeerJ. 2020 Feb 21;8:e8600. doi: 10.7717/peerj.8600. eCollection 2020.	2020	China	756 patients	ELISA,	PRNCR1,POU5F1B	rs12682421- PRNCR1, rs6983267-POU5F1B
32083000	PVT1 Long Non-coding RNA in Gastrointestinal Cancer	Martínez-Barriocanal Á, Arango D, Dopeso H.	Front Oncol. 2020 Jan 31;10:38. doi: 10.3389/fonc.2020.00038. eCollection 2020.	2020	Asia	756 GC samples	GWAS	PVT1 y MYC
31699156	Copy number of 8q24.3 drives HSF1 expression and patient outcome in cancer: an individual patient data meta-analysis	Brusselaers N, Ekwall K, Durand-Dubief M.	Hum Genomics. 2019 Nov 7;13(1):54. doi: 10.1186/s40246-019-0241-3.	2019	NA	Using data from cBioportal portal	Meta-analysis	HSF1	NA
31141411	Analysis of 8q24.21 miRNA cluster expression and copy number variation in gastric cancer	Anauate AC, Leal MF, Wisnieski F, Santos LC, Gigek CO, Chen ES, Calcagno DQ, Assumpção PP, Demachki S, Arasaki CH, Artigiani R, Rasmussen LT, Payão SM, Burbano RR, C Smith MA.	Future Med Chem. 2019 May;11(9):947-958. doi: 10.4155/fmc-2018-0477. Epub 2019 May 29.	2019	Sao Paulo, Brasil	65 paired neoplastic and non-neoplastic specimens collected from patients wth GC and 20 non-neoplastic gastric tissues from individuals without cancer.	q-PCR	MYC, PVT1	NA
30541591	Transmembrane protein GRINA modulates aerobic glycolysis and promotes tumor progression in gastric cancer	Xu DH, Li Q, Hu H, Ni B, Liu X, Huang C, Zhang ZZ, Zhao G.	J Exp Clin Cancer Res. 2018 Dec 12;37(1):308. doi: 10.1186/s13046-018-0974-1.	2018	Shangai, China	569 patients	rt-PCR	C-MYC, GRINA	NA
30191681	Evidence for PTGER4, PSCA, and MBOAT7 as risk genes for gastric cancer on the genome and transcriptome level	Heinrichs SKM, Hess T, Becker J, Hamann L, Vashist YK, Butterbach K, Schmidt T, Alakus H, Krasniuk I, Höblinger A, Lingohr P, Ludwig M, Hagel AF, Schildberg CW, Veits L, Gyvyte U, Weise K, Schüller V, Böhmer AC, Schröder J, Gehlen J, Kreuser N, Hofer S, Lang H, Lordick F, Malfertheiner P, Moehler M, Pech O, Vassos N, Rodermann E, Izbicki JR, Kruschewski M, Ott K, Schumann RR, Vieth M, Mangold E, …	Cancer Med. 2018 Oct;7(10):5057-5065. doi: 10.1002/cam4.1719. Epub 2018 Sep 6.	2018	Europe	Patients with 680 GC women, 1246 male, controls: 985 women and 1027 males	Sequenom MassARRAY iPlex Gold	JRK, PSCA, LY6K, MBOAT7	rs2585176, rs2920283-PSCA, rs2294008-MBOAT7, rs2585183
29232378	Genetic variations at 8q24 and gastric cancer susceptibility: A meta-analysis study	Zhi P, Shi J, Liu F.	PLoS One. 2017 Dec 12;12(12):e0188774. doi: 10.1371/journal.pone.0188774. eCollection 2017.	2017	NA	59 publications, 1424 GC, and 3393 controls	PCR-RELP/TaqMan	TCF4, c-MYC, POU5F1P1	rs6983267-c-MYC,rs1447295
29138729	Association of rs2294008 and rs9297976 Polymorphisms in PSCA Gene with Gastric Cancer Susceptibility in Uzbekistan	Turdikulova S, Dalimova D, Abdurakhimov A, Adilov B, Navruzov S, Yusupbekov A, Djuraev M, Abdujapparov S, Egamberdiev D, Mukhamedov R.	Cent Asian J Glob Health. 2016 Dec 13;5(1):227. doi: 10.5195/cajgh.2016.227. eCollection 2016.	2016	Uzbekistan	268 patients with GC and 248 controls	DNA extraction kit Diatom™ DNA Prep 200, PCR-RFLP	PSCA	rs2294008-PSCA, rs2976392-PSCA, rs9297976-PSCA
29028942	Association of high-evidence gastric cancer susceptibility loci and somatic gene expression levels with survival	Sung H, Hu N, Yang HH, Giffen CA, Zhu B, Song L, Su H, Wang C, Parisi DM, Goldstein AM, Taylor PR, Hyland PL.	Carcinogenesis. 2017 Oct 26;38(11):1119-1128. doi: 10.1093/carcin/bgx090.	2017	China	1147 cases	NA	PSCA, JRK, MTX1	rs2294008- PSCA, JRK, rs2070803- MTX1, rs2075570-MTX1
28367233	Association of Genetic Polymorphisms in the LncRNAs with Gastric Cancer Risk in a Chinese Population	He BS, Sun HL, Xu T, Pan YQ, Lin K, Gao TY, Zhang ZY, Wang SK.	J Cancer. 2017 Feb 11;8(4):531-536. doi: 10.7150/jca.17519. eCollection 2017.	2017	China	494 patients	Extracción DNA	PRNCR1, PCAT1, CCAT2	PRNCR1: rs7463708, rs7007694,rs16901946, rs13252298; PCAT1: rs1026411,rs12543663; CCAT2: rs6983267
28123544	Molecular heterogeneity in the novel fusion gene APIP-FGFR2: Diversity of genomic breakpoints in gastric cancer with high-level amplifications at 11p13 and 10q26	Okuda T, Taki T, Nishida K, Chinen Y, Nagoshi H, Sakakura C, Taniwaki M.	Oncol Lett. 2017 Jan;13(1):215-221. doi: 10.3892/ol.2016.5386. Epub 2016 Nov 15.	2017	Japan	NA	RT-PCR	MYC, PVT1
27312513	Genome-wide analysis of DNA copy number alterations in early and advanced gastric cancers	Arakawa N, Sugai T, Habano W, Eizuka M, Sugimoto R, Akasaka R, Toya Y, Yamamoto E, Koeda K, Sasaki A, Matsumoto T, Suzuki H.	Mol Carcinog. 2017 Feb;56(2):527-537. doi: 10.1002/mc.22514. Epub 2016 Aug 24.	2017	Japan	65 patients (45 EGC and 20 AGC)		IGFBPL, CSMD1, FHIT	NA
27175302	Association Between Amplification and Expression of C-MYC Gene and Clinicopathological Characteristics of Stomach Cancer	Khaleghian M, Jahanzad I, Shakoori A, Emami Razavi A, Azimi C.	Iran Red Crescent Med J. 2016 Jan 1;18(2):e21221. doi: 10.5812/ircmj.21221. eCollection 2016 Feb.	2016	Iran and Teheran	102 samples with gastric cancer	CISH e IHC	MYC	NA
26514491	Relationship of Amplification and Expression of the C-MYC Gene with Survival among Gastric Cancer Patients	Khaleghian M, Shakoori A, Razavi AE, Azimi C.	Asian Pac J Cancer Prev. 2015;16(16):7061-9. doi: 10.7314/apjcp.2015.16.16.7061.	2015	Iran and Teheran	102 samples with gastric cancer	CISH e IHC, RT-PCR	C-MYC	NA
26360582	Copy Number Gains at 8q24 and 20q11-q13 in Gastric Cancer Are More Common in Intestinal-Type than Diffuse-Type	Jin DH, Park SE, Lee J, Kim KM, Kim S, Kim DH, Park J.	PLoS One. 2015 Sep 11;10(9):e0137657. doi: 10.1371/journal.pone.0137657. eCollection 2015.	2015	Korea	88 patients, 40 GC and 48 controls	Qrt-PCR	MYC, POU5F1B	NA
26206497	Association between polymorphisms in long non-coding RNA PRNCR1 in 8q24 and risk of gastric cancer	Li L, Jia F, Bai P, Liang Y, Sun R, Yuan F, Zhang L, Gao L.	Tumour Biol. 2016 Jan;37(1):299-303. doi: 10.1007/s13277-015-3750-2. Epub 2015 Jul 24.	2016	China	613 samples, 219 cases with GC and 394 controls.	PCR-RFLP	PRNCR1	PRNCR1- rs1016343, rs13252298, rs7007694, rs16901946, and rs1456315
25939847	Association of common variants on chromosome 8q24 with gastric cancer in Venezuelan patients	Labrador L, Torres K, Camargo M, Santiago L, Valderrama E, Chiurillo MA.	Gene. 2015 Jul 15;566(1):120-4. doi: 10.1016/j.gene.2015.04.081. Epub 2015 May 2.	2015	Venezuela	122 cancer samples, 129 with crhonic gastritis	PCR-RFLP	NA	rs1447295, rs4733616 and rs6983267
25731870	Genetic variation and gastric cancer risk: a field synopsis and meta-analysis	Mocellin S, Verdi D, Pooley KA, Nitti D.	Gut. 2015 Aug;64(8):1209-19. doi: 10.1136/gutjnl-2015-309168. Epub 2015 Mar 2.	2015	Asian and caucasian patients	NA	Meta-analysis	PSCA	rs2294008-PSCA
25618371	Recurrent amplification of MYC and TNFRSF11B in 8q24 is associated with poor survival in patients with gastric cancer	Wang X, Liu Y, Shao D, Qian Z, Dong Z, Sun Y, Xing X, Cheng X, Du H, Hu Y, Li Y, Li L, Dong B, Li Z, Wu A, Wu X, Bu Z, Zong X, Zhu G, Ji Q, Wen XZ, Zhang LH, Ji JF.	Gastric Cancer. 2016 Jan;19(1):116-27. doi: 10.1007/s10120-015-0467-2. Epub 2015 Jan 25.	2016	Pekin, China	129 patients	aCGH	MYC, TNFRSF11B	NA
25302443	Genetic variant in 8q24 is associated with prognosis for gastric cancer in a Chinese population	Ma G, Gu D, Lv C, Chu H, Xu Z, Tong N, Wang M, Tang C, Xu Y, Zhang Z, Wang B, Chen J.	J Gastroenterol Hepatol. 2015 Apr;30(4):689-95. doi: 10.1111/jgh.12801.	2015	China	940 patients	multiplex SNaPshot technology	CASC8, POU5F1B, MYC	CASC8-rs10505477, rs1562430, rs6983267-MYC
24968865	ADRM1 gene amplification is a candidate driver for metastatic gastric cancers	Jang SH, Park JW, Kim HR, Seong JK, Kim HK.	Clin Exp Metastasis. 2014 Aug;31(6):727-33. doi: 10.1007/s10585-014-9663-4. Epub 2014 Jun 27.	2014	Goyang, Korea	32 patients	CGH	MYC, ADRM1
24944681	Chromosome 8q as the most frequent target for amplification in early gastric carcinoma	Kang JU.	Oncol Lett. 2014 Apr;7(4):1139-1143. doi: 10.3892/ol.2014.1849. Epub 2014 Feb 3.	2014	Taejeon, Korea	22 samples with GC	CGH	CYHR1, PVT1 KIFC2, FOXH1, PPP1R16A, GPT, LOC113655 and RECQL4	NA
24654646	Genetic variants at 8q24 are associated with risk of esophageal squamous cell carcinoma in a Chinese population	Dai N, Zheng M, Wang C, Ji Y, Du J, Zhu C, He Y, Zhu M, Zhu X, Sun M, Dai J, Ma H, Chen J, Hu Z, Gu H, Jin G, Shen H.	Cancer Sci. 2014 Jun;105(6):731-5. doi: 10.1111/cas.12399. Epub 2014 Apr 13.	2014	Nanjing, China-Huai'an, China	2139 cases with ESCC and 2273 controls.	GWAS	PSCA	rs2294008-PSCA
24362523	The OCT4 pseudogene POU5F1B is amplified and promotes an aggressive phenotype in gastric cancer	Hayashi H, Arao T, Togashi Y, Kato H, Fujita Y, De Velasco MA, Kimura H, Matsumoto K, Tanaka K, Okamoto I, Ito A, Yamada Y, Nakagawa K, Nishio K.	Oncogene. 2015 Jan 8;34(2):199-208. doi: 10.1038/onc.2013.547. Epub 2013 Dec 23.	2015	Japan	145 patients wth GC	RT-PCR	POU5F1B, MYC	NA
24030569	Genetic variation at 8q24, family history of cancer, and upper gastrointestinal cancers in a Chinese population	Tarleton HP, Chang SC, Park SL, Cai L, Ding B, He N, Hussain SK, Jiang Q, Mu LN, Rao J, Wang H, You NC, Yu SZ, Zhao JK, Zhang ZF.	Fam Cancer. 2014 Mar;13(1):45-56. doi: 10.1007/s10689-013-9673-4.	2014	Taixing, Jiangsu, China.	206 cases with GC, and 415 controls	GWAS	MYC	rs1447295, rs16901979, rs6983267-MYC
22387998	A genome-wide association study identifies two susceptibility loci for duodenal ulcer in the Japanese population	Tanikawa C, Urabe Y, Matsuo K, Kubo M, Takahashi A, Ito H, Tajima K, Kamatani N, Nakamura Y, Matsuda K.	Nat Genet. 2012 Mar 4;44(4):430-4, S1-2. doi: 10.1038/ng.1109.	2012	Japan	7035 samples with duodenal ulcer and 25 323 controls	GWAS	PSCA	rs2294008-PSCA
22037551	A genome-wide association study identifies new susceptibility loci for non-cardia gastric cancer at 3q13.31 and 5p13.1	Shi Y, Hu Z, Wu C, Dai J, Li H, Dong J, Wang M, Miao X, Zhou Y, Lu F, Zhang H, Hu L, Jiang Y, Li Z, Chu M, Ma H, Chen J, Jin G, Tan W, Wu T, Zhang Z, Lin D, Shen H.	Nat Genet. 2011 Oct 30;43(12):1215-8. doi: 10.1038/ng.978.	2011	Han, China	3279 samples, 1106 GC and 2273 controls	GWAS	NA	rs2294008 and rs2976392
21483638	Association between polymorphism rs6983267 and gastric cancer risk in Chinese population	Guo Y, Fang J, Liu Y, Sheng HH, Zhang XY, Chai HN, Jin W, Zhang KH, Yang CQ, Gao HJ.	World J Gastroenterol. 2011 Apr 7;17(13):1759-65. doi: 10.3748/wjg.v17.i13.1759.	2011	Shanghai pacients	212 patients with gastric cancer and 377 controls.	Flexi Gene DNA Kit, PCR-RFLP	POU5F1P1, MYC	rs6983267-POU5F1P1, rs6983267-MYC
21259245	Analysis of DNA copy number aberrations by multiple ligation-dependent probe amplification on 50 intestinal type gastric cancers	Zhang D, Wang Z, Luo Y, Xu Y, Liu Y, Yang W, Zhang X.	J Surg Oncol. 2011 Feb;103(2):124-32. doi: 10.1002/jso.21792. Epub 2010 Dec 22.	2011	China	50 intestinal gastric cancer	PCR, multiplex ligation-dependent probe amplification (MLPA)	PTK2, MYC
21102338	Possible association between a genetic polymorphism at 8q24 and risk of upper gastrointestinal cancer	Lochhead P, Ng MT, Hold GL, Rabkin CS, Vaughan TL, Gammon MD, Risch HA, Lissowska J, Mukhopadhya I, Chow WH, El-Omar EM.	Eur J Cancer Prev. 2011 Jan;20(1):54-7. doi: 10.1097/CEJ.0b013e328341e320.	2011	Caucasians	Firts study: 290 cancer gastric and 374 controls. Second study: 308 samples with gastric cancer	Real-time PCR using predesigned Taqman® assays with 5' minor groove binding probes labeled with FAM or VIC fluorophores	MYC	rs1447295, rs6983267-MYC
20620594	Genetic profiles of gastroesophageal cancer: combined analysis using expression array and tiling array--comparative genomic hybridization	Isinger-Ekstrand A, Johansson J, Ohlsson M, Francis P, Staaf J, Jönsson M, Borg A, Nilbert M.	Cancer Genet Cytogenet. 2010 Jul 15;200(2):120-6. doi: 10.1016/j.cancergencyto.2010.03.013.	2010	NA	27 gastroesophageal adenocarcinomas	high-resolution array-based comparative genomic hybridization	CDK6 y EGFR	NA
20179237	High-resolution array comparative genomic hybridization in sporadic and celiac disease-related small bowel adenocarcinomas	Diosdado B, Buffart TE, Watkins R, Carvalho B, Ylstra B, Tijssen M, Bolijn AS, Lewis F, Maude K, Verbeke C, Nagtegaal ID, Grabsch H, Mulder CJ, Quirke P, Howdle P, Meijer GA.	Clin Cancer Res. 2010 Mar 1;16(5):1391-401. doi: 10.1158/1078-0432.CCR-09-1773. Epub 2010 Feb 23.	2010	United Kingdom	48 adenocarcinomas of the small intestine (33 control and 15 related with the disease).	PCR	C-MYC	NA
19023234	Total number of genome alterations in sporadic gastrointestinal cancer inferred from pooled analyses in the literature	Nishimura T.	Tumour Biol. 2008;29(6):343-50. doi: 10.1159/000176044. Epub 2008 Nov 21.	2008	NA	NA	Meta-analysis	NA	NA
18990762	Associations between variants of the 8q24 chromosome and nine smoking-related cancer sites	Park SL, Chang SC, Cai L, Cordon-Cardo C, Ding BG, Greenland S, Hussain SK, Jiang Q, Liu S, Lu ML, Mao JT, Morgenstern H, Mu LN, Ng LJ, Pantuck A, Rao J, Reuter VE, Tashkin DP, You NC, Yu CQ, Yu SZ, Zhao JK, Belldegrun A, Zhang ZF.	Cancer Epidemiol Biomarkers Prev. 2008 Nov;17(11):3193-202. doi: 10.1158/1055-9965.EPI-08-0523.	2008	LA, Taixing. China, NY	NA	Genotyping using TaqMan assays, RT-PCR	MYC, POU5F1P1	rs1447295, rs6983267
18000363	High-resolution array comparative genomic hybridization of chromosome 8q: evaluation of putative progression markers for gastroesophageal junction adenocarcinomas	van Duin M, van Marion R, Vissers KJ, Hop WC, Dinjens WN, Tilanus HW, Siersema PD, van Dekken H.	Cytogenet Genome Res. 2007;118(2-4):130-7. doi: 10.1159/000108293.	2007	NA	22 patients	RT-PCR, aCGH	MYC, FAM84B, ANXA13, MTSS1, PTK2, C8orf17, EXT1	NA
16886612	C-MYC locus amplification as metastasis predictor in intestinal-type gastric adenocarcinomas: CGH study in Brazil	Burbano RR, Assumpção PP, Leal MF, Calcagno DQ, Guimarães AC, Khayat AS, Takeno SS, Chen ES, De Arruda Cardoso Smith M.	Anticancer Res. 2006 Jul-Aug;26(4B):2909-14.	2006	Brasil	21 patients	CGH	C-MYC	NA
16127741	Recurrent chromosomal rearrangements at bands 8q24 and 11q13 in gastric cancer as detected by multicolor spectral karyotyping	Yamashita Y, Nishida K, Okuda T, Nomura K, Matsumoto Y, Mitsufuji S, Horiike S, Hata H, Sakakura C, Hagiwara A, Yamagishi H, Taniwaki M.	World J Gastroenterol. 2005 Sep 7;11(33):5129-35. doi: 10.3748/wjg.v11.i33.5129.	2005	Korea, Japan	10 cell lines and 7 patients	DC-FISH	MYC	NA
15623941	Genomic alterations in primary gastric adenocarcinomas correlate with clinicopathological characteristics and survival	Weiss MM, Kuipers EJ, Postma C, Snijders AM, Pinkel D, Meuwissen SG, Albertson D, Meijer GA.	Cell Oncol. 2004;26(5-6):307-17. doi: 10.1155/2004/454238.	2004	NA	35 adenocarciom gastric patients	CGH	C-MYC	NA
15237194	Establishment and characterization of a human gastric carcinoma cell line TMC-1	Shyu RY, Jiang SY, Jong YJ, Cheng KC, Lin CH, Yu JC, Wu MF, Chang TM.	Cells Tissues Organs. 2004;177(1):37-46. doi: 10.1159/000078426.	2004	Chinese women	NA	NA	NA	NA
10565296	Interstitial deletion of 8(q13q22) in diffuse large B-cell gastric lymphoma	Fan YS, Rizkalla K, Engel J.	Cancer Genet Cytogenet. 1999 Nov;115(1):28-31. doi: 10.1016/s0165-4608(99)00078-3.	1999	NA	1 patient 74 years old	FISH	C-MYC	NA
9759658	Amplification of c-myc, K-sam, and c-met in gastric cancers: detection by fluorescence in situ hybridization	Hara T, Ooi A, Kobayashi M, Mai M, Yanagihara K, Nakanishi I.	Lab Invest. 1998 Sep;78(9):1143-53.	1998	NA	154 primary gastric adenocarcinoma	FISH and PCR	C-MYC	NA
9669668	Comparative genomic hybridization of esophageal and gastroesophageal adenocarcinomas shows consensus areas of DNA gain and loss	Moskaluk CA, Hu J, Perlman EJ.	Genes Chromosomes Cancer. 1998 Aug;22(4):305-11.	1998	Virginia	15 samples	CGH	ERBB2 and MCY	NA
7664243	Increasing levels of MYC and MET co-amplification during tumor progression of a case of gastric cancer	Seruca R, Suijkerbuijk RF, Gärtner F, Criado B, Veiga I, Olde-Weghuis D, David L, Castedo S, Sobrinho-Simões M.	Cancer Genet Cytogenet. 1995 Jul 15;82(2):140-5. doi: 10.1016/0165-4608(95)00033-l.	1995	Cape Town, Africa	1 patient 39 years old	CGH	MYC, MET	NA
*NA, Not available
